# Supplementary material
Source: PubMed Central journal article supplement (PMC7179509)

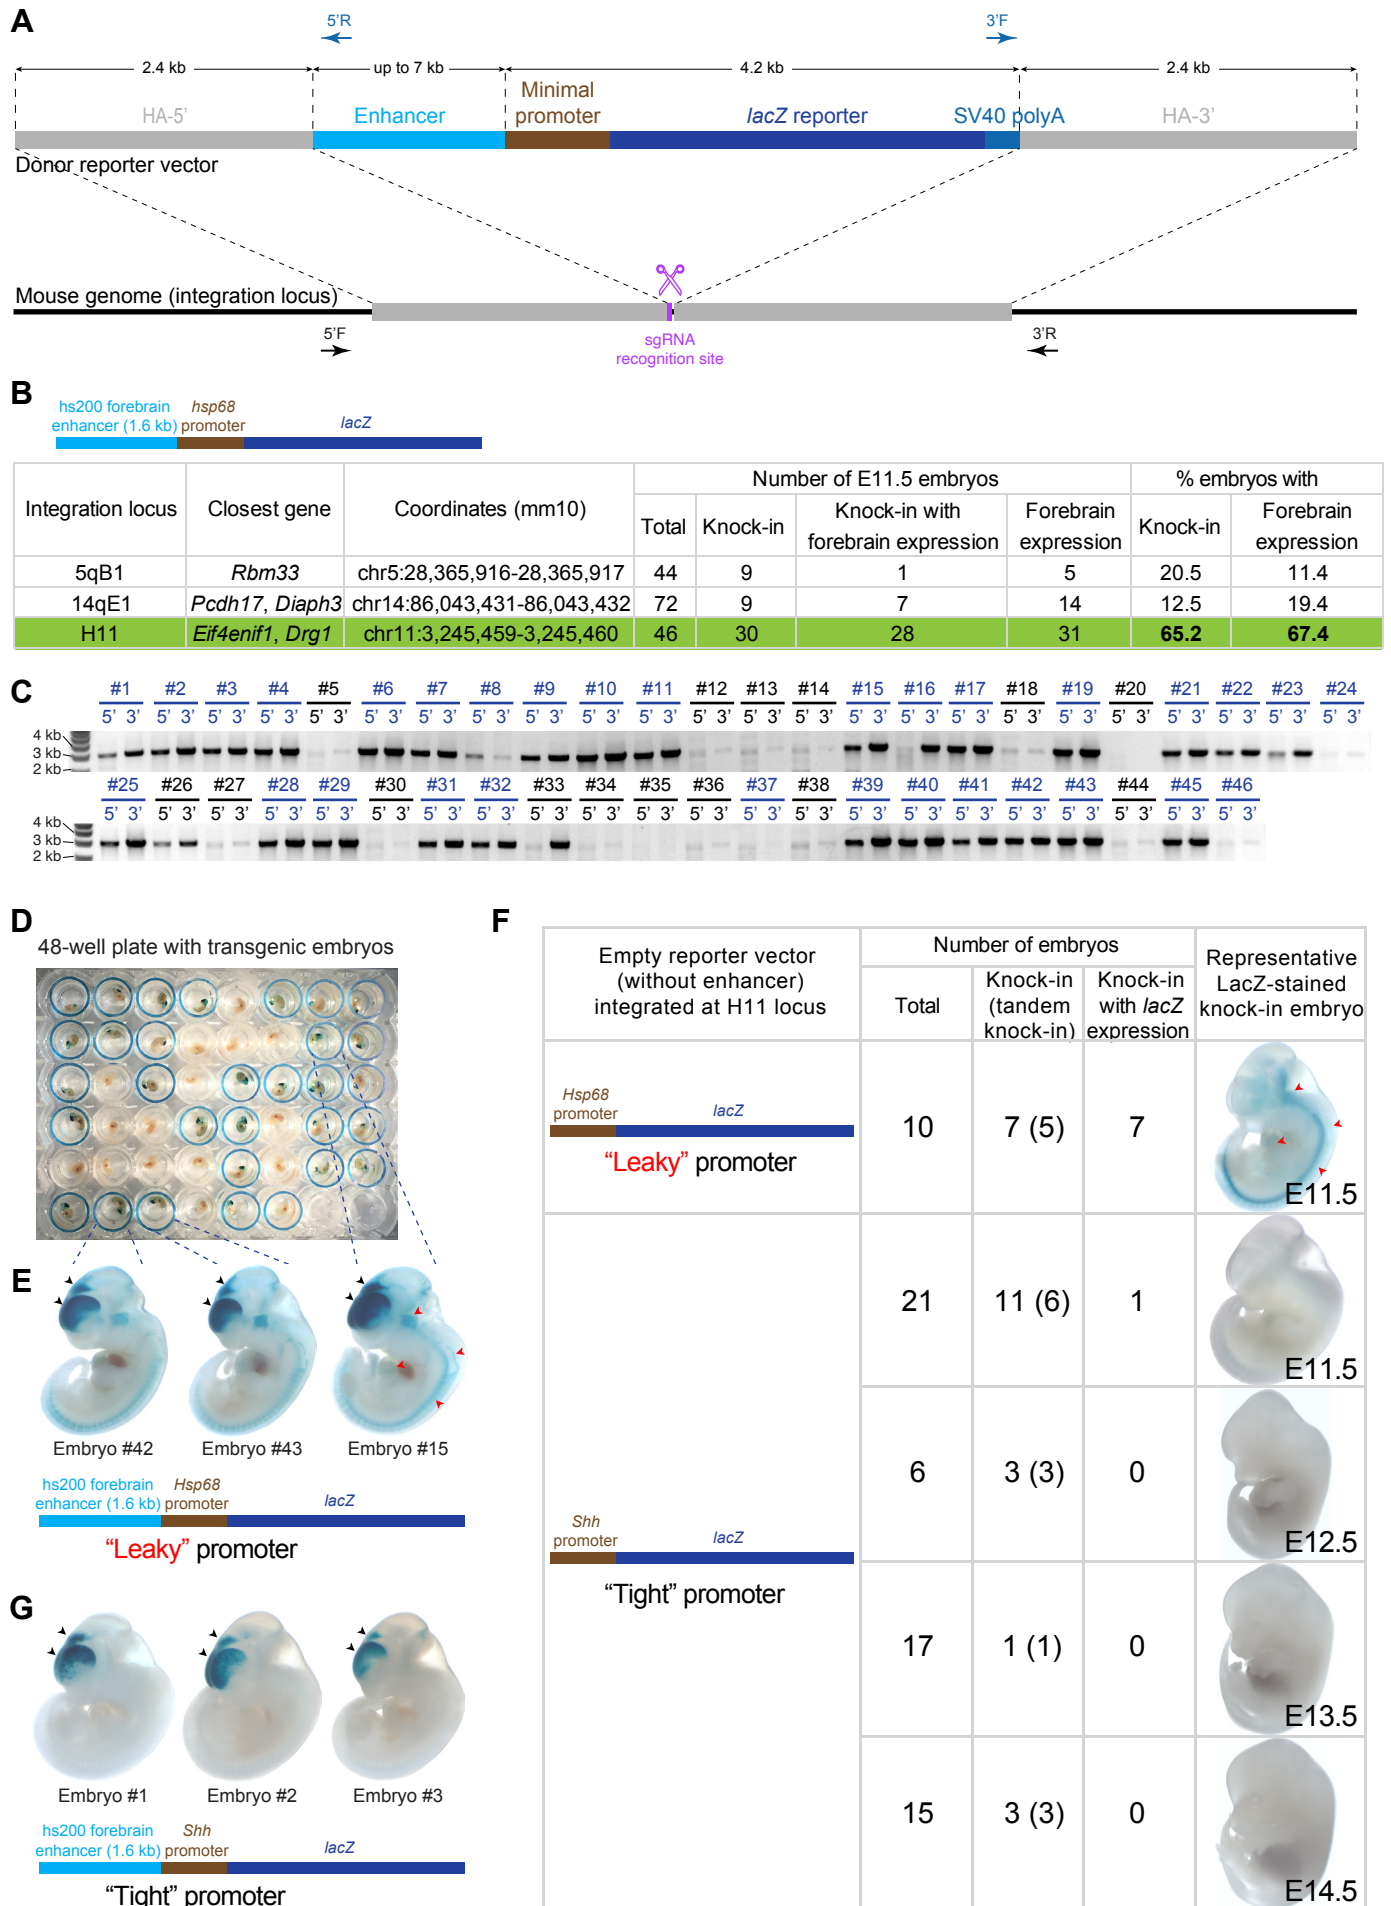

Supplement: NIHMS1568780-supplement-1.pdf [file NIHMS1568780-supplement-1.pdf]

**A**

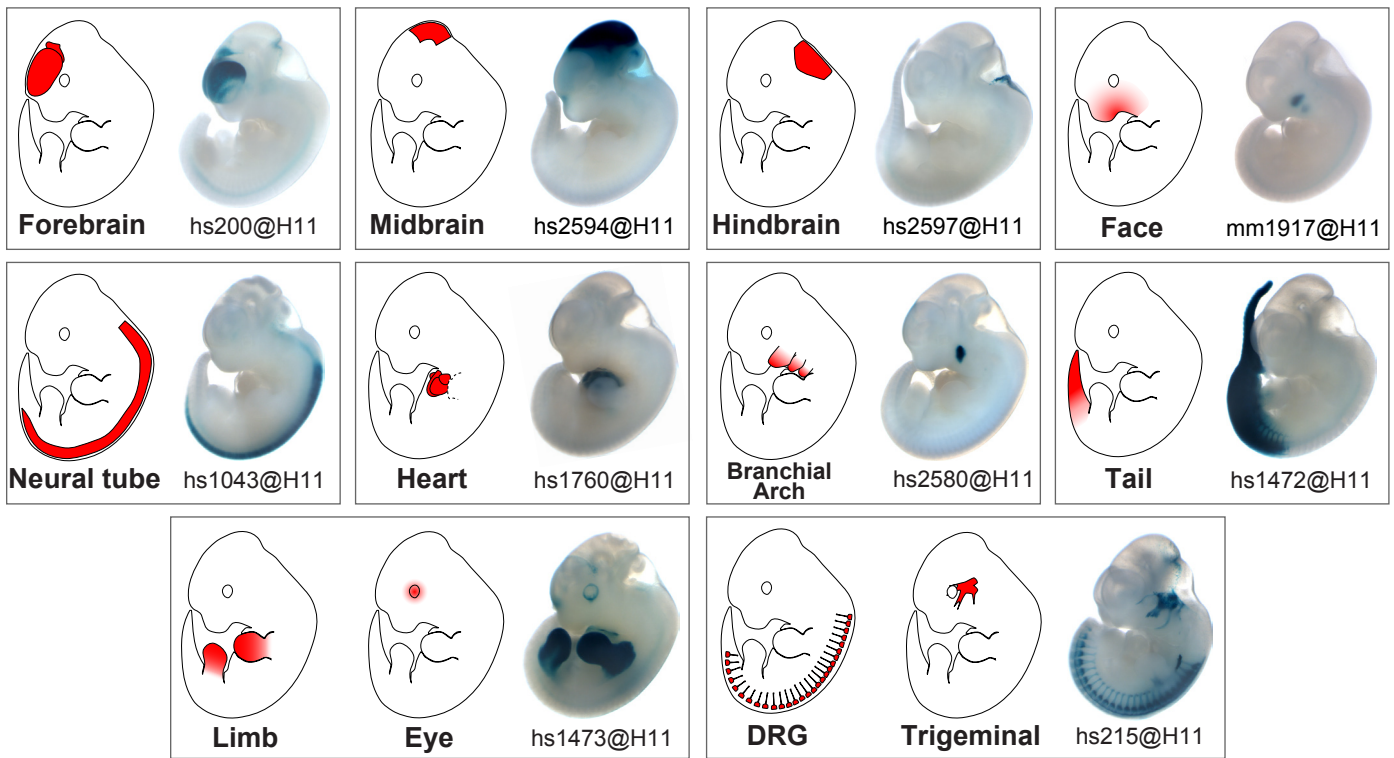

**B**

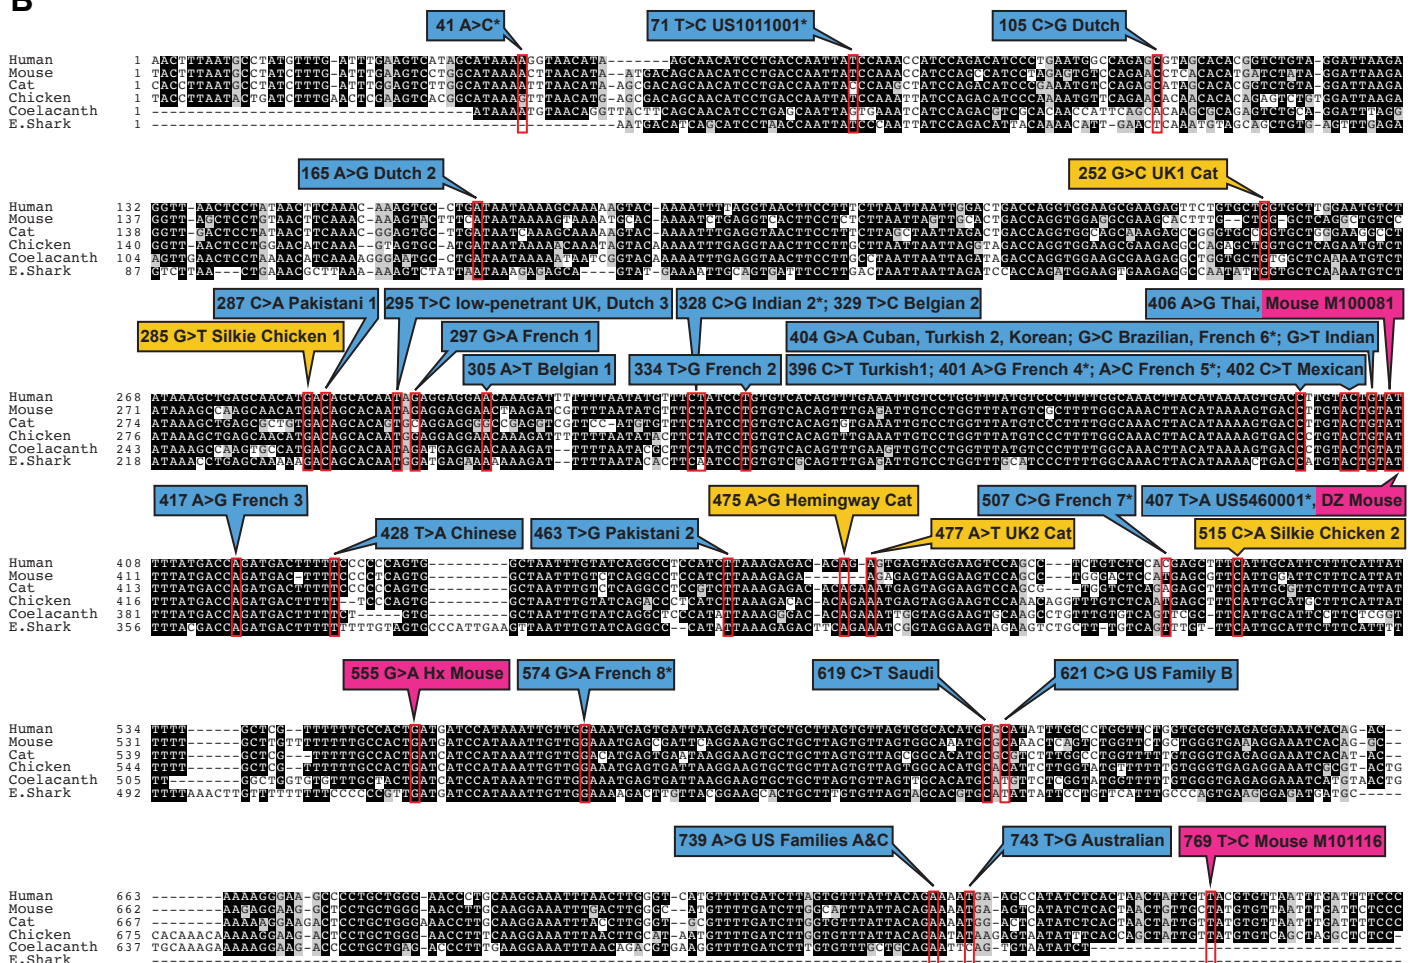

Supplement: NIHMS1568780-supplement-2.pdf [file NIHMS1568780-supplement-2.pdf]

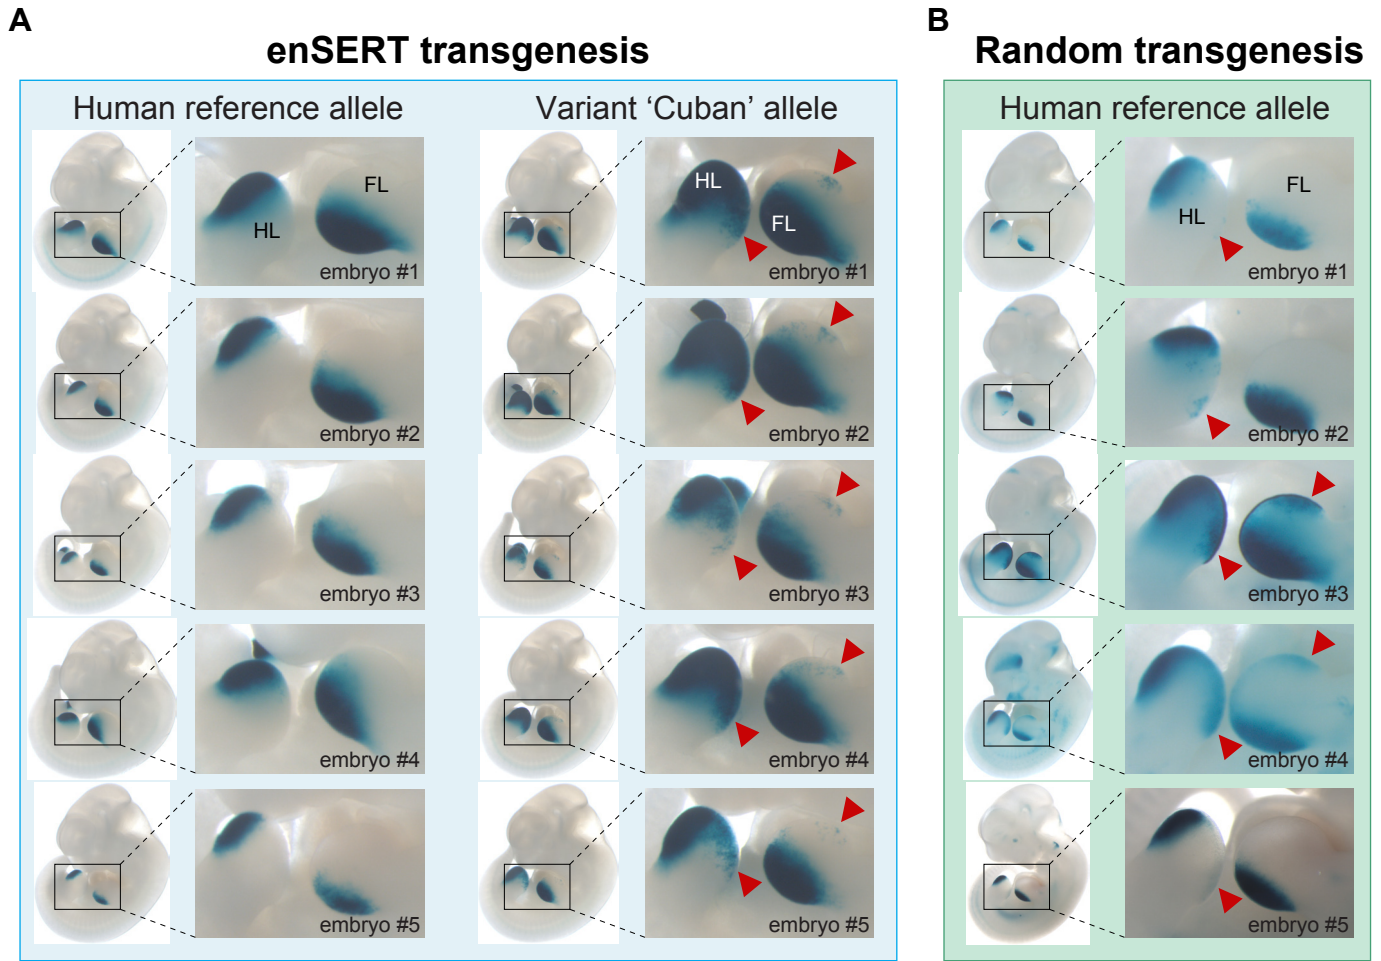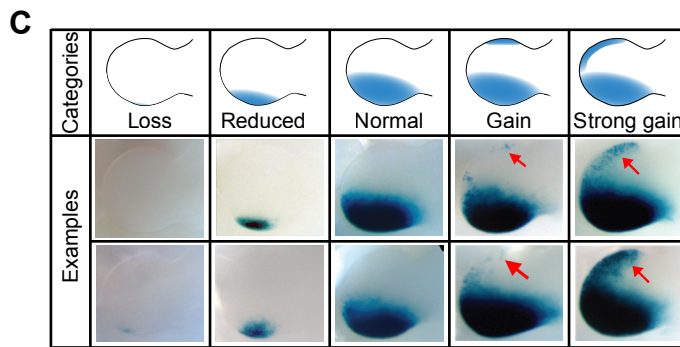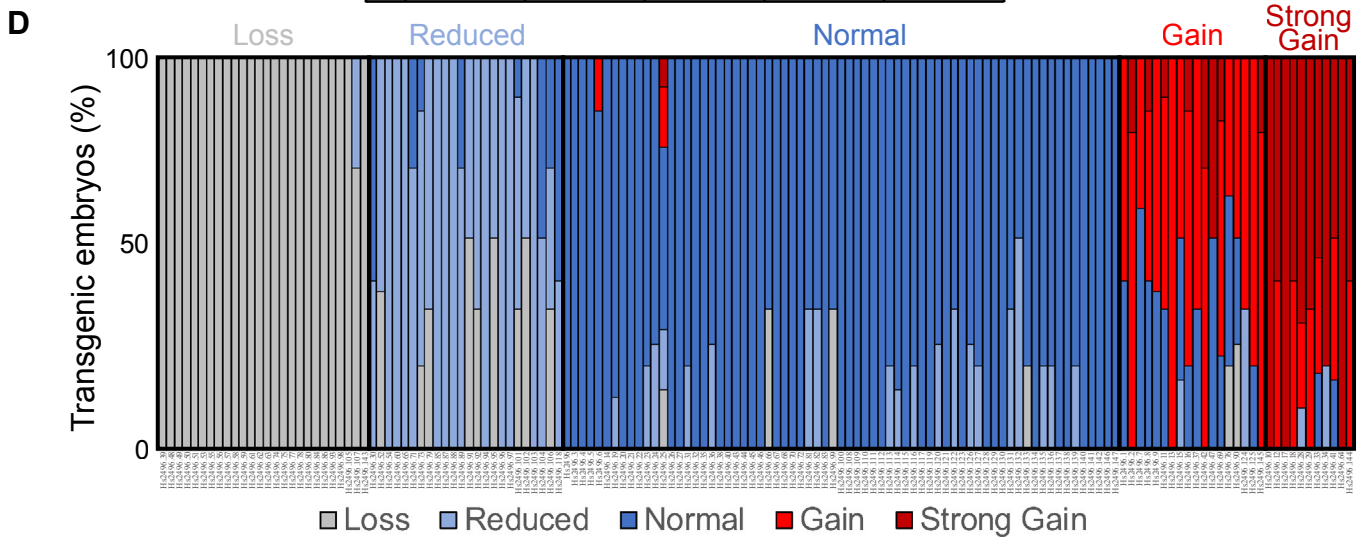

Supplement: NIHMS1568780-supplement-3.pdf [file NIHMS1568780-supplement-3.pdf]

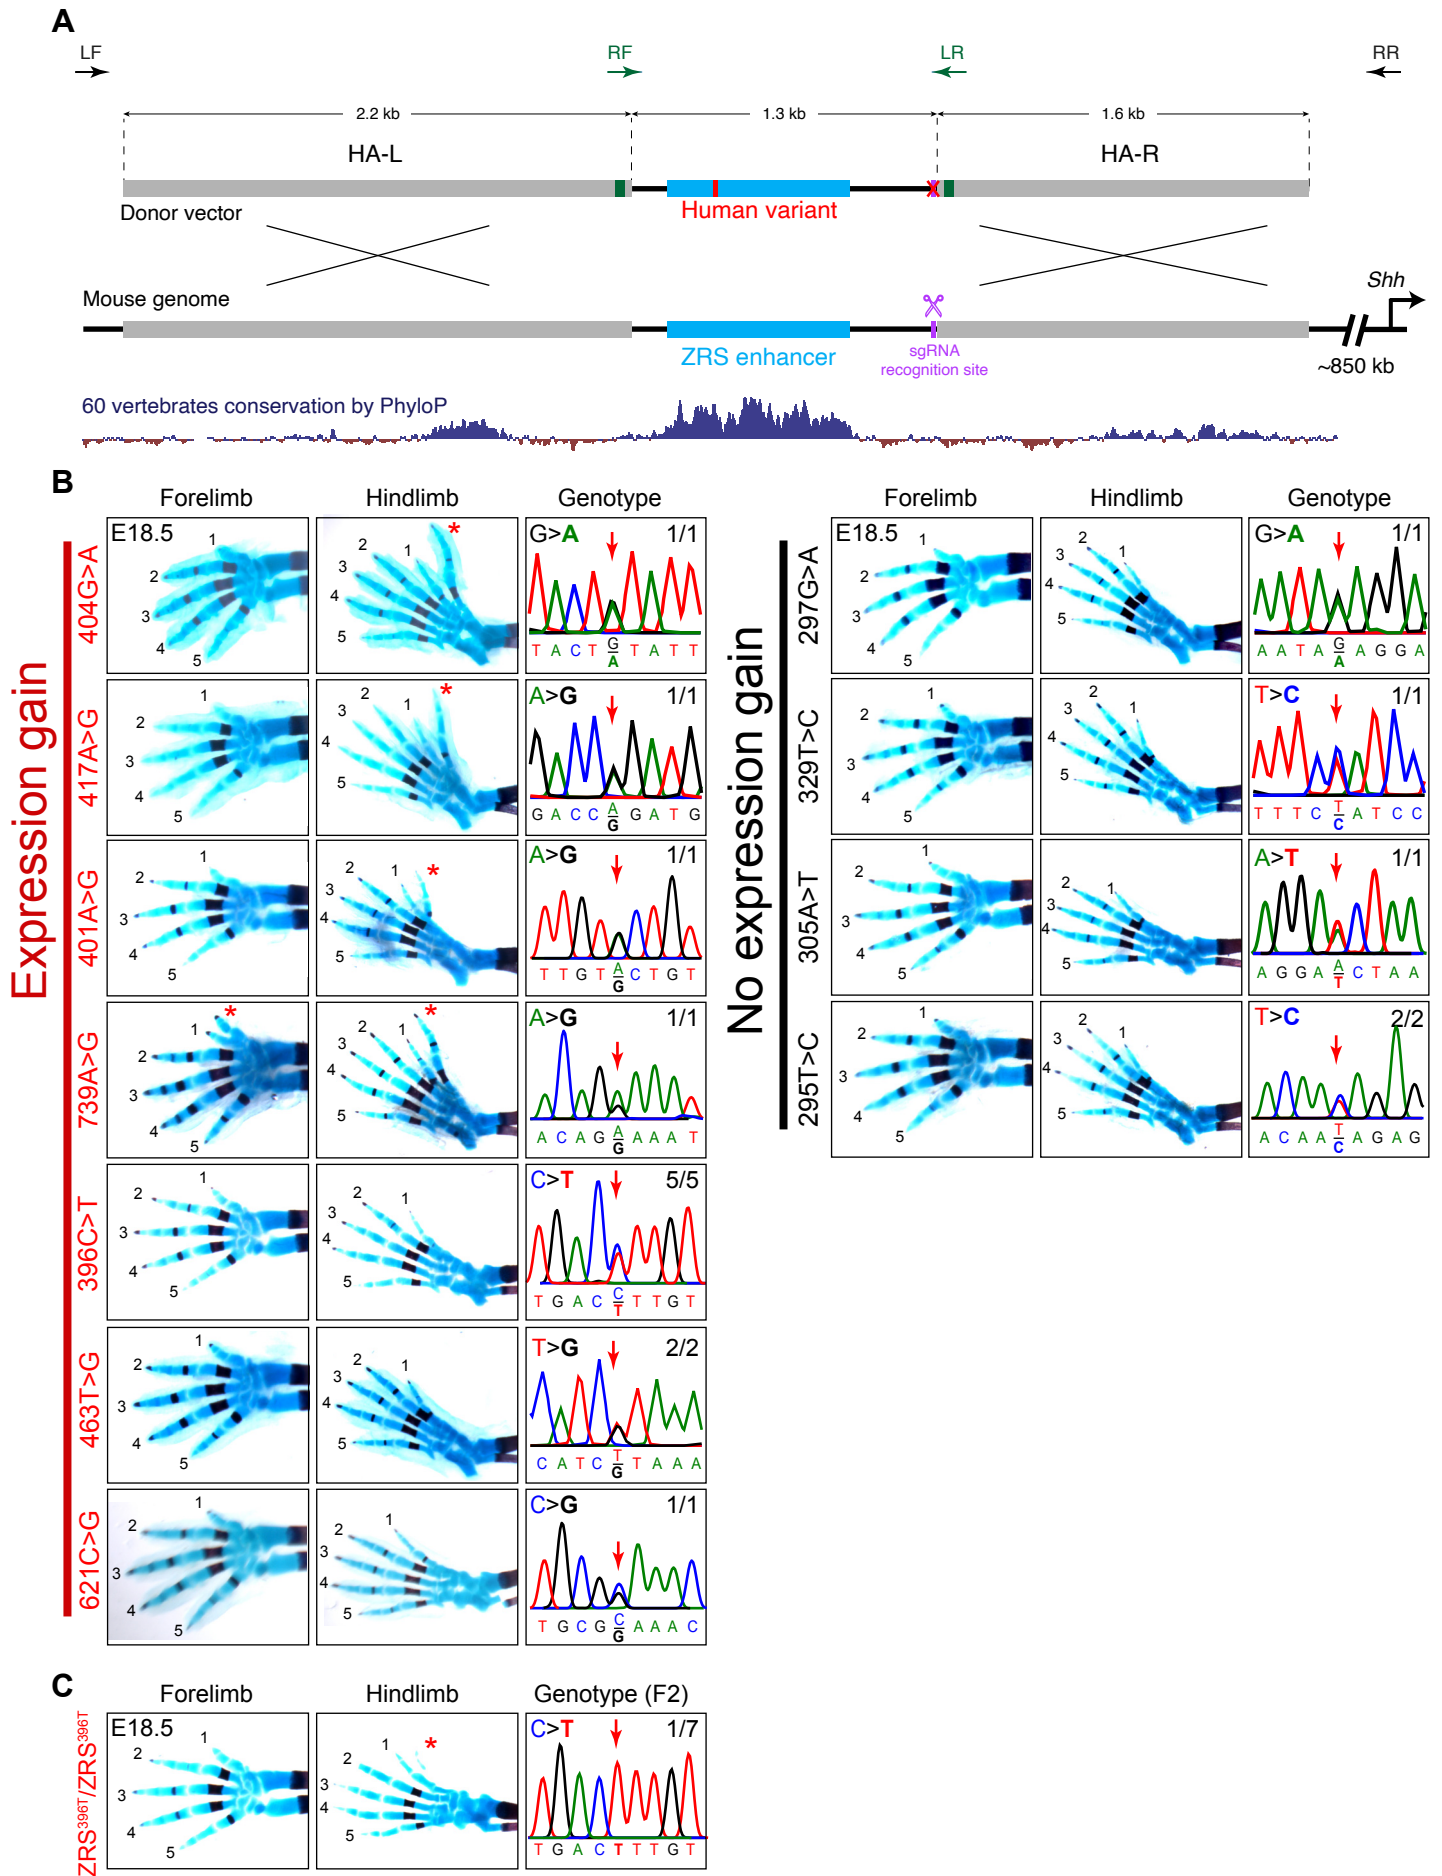

Supplement: NIHMS1568780-supplement-4.pdf [file NIHMS1568780-supplement-4.pdf]
